# Supplementary material for: Vitreous expression of cytokines and growth factors in patients with diabetic retinopathy—An investigation of their expression based on clinical diabetic retinopathy grade
Source: PubMed Central journal article supplement (PMC8133486; doi:10.1371/journal.pone.0248439), 2021-05-19

## Patient 1 (ILV-01)

|                                               |               |
|-----------------------------------------------|---------------|
| Age and sex:                                  | 49, male      |
| Study eye:                                    | Left          |
| HbA1C:                                        | 5.58          |
| Blood Pressure:                               | 140/70        |
| Diabetes mellitus type:                       | Type 2        |
| Diabetes duration since diagnosis:            | 1.06 years    |
| Taking insulin:                               | Yes           |
| ETDRS classification of diabetic retinopathy: | High-risk PDR |
| Assigned group:                               | PDR           |
| Fluoresceine Angiography:                     |               |
| Leakage (Fovea centralis affected)            | Yes           |
| Central Ischemia:                             | Yes           |
| Neovascularization of the optic disc (NVD):   | Yes           |
| Neovascularization elsewhere (NVE):           | Yes           |

ID : ILV1

Name : 01 ILV1-

OS(L)

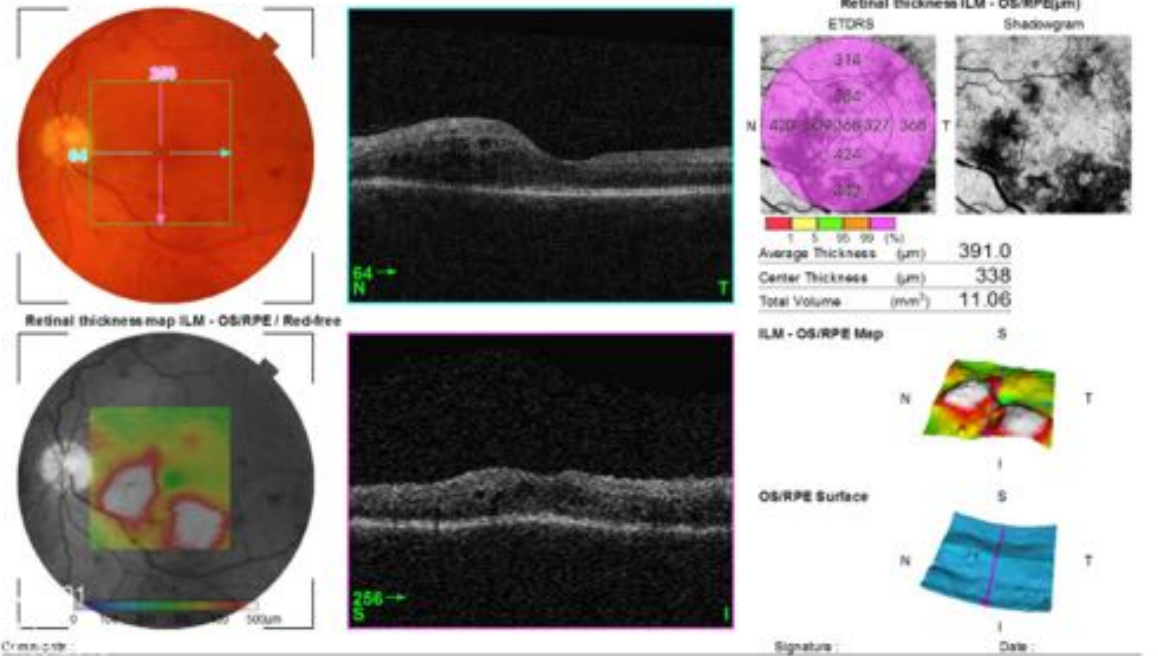

## Patient 2 (ILV-02)

|                                               |             |
|-----------------------------------------------|-------------|
| Age and sex:                                  | 60, male    |
| Study eye:                                    | Left        |
| HbA1C:                                        | 5.94        |
| Blood Pressure:                               | 120/80      |
| Diabetes mellitus type:                       | Type 2      |
| Diabetes duration since diagnosis:            | 13.22 years |
| Taking insulin:                               | Yes         |
| ETDRS classification of diabetic retinopathy: | Severe NPDR |
| Assigned group:                               | NPDR        |
| Fluoresceine Angiography:                     |             |
| Leakage (Fovea centralis affected)            | Yes         |
| Central Ischemia:                             | Yes         |
| Neovascularization of the optic disc (NVD):   | No          |
| Neovascularization elsewhere (NVE):           | No          |

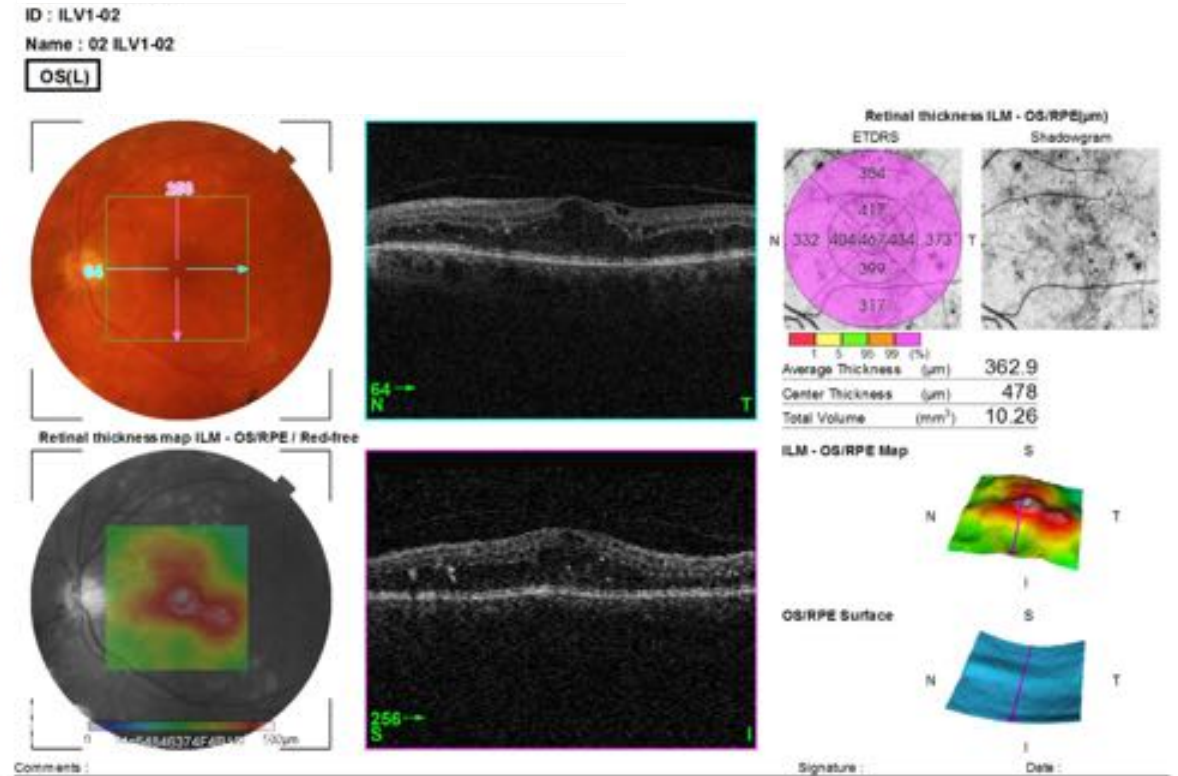

## Patient 3 (ILV-03)

|                                               |               |
|-----------------------------------------------|---------------|
| Age and sex:                                  | 56, male      |
| Study eye:                                    | Right         |
| HbA1C:                                        | 6.48          |
| Blood Pressure:                               | 120/80        |
| Diabetes mellitus type:                       | Type 2        |
| Diabetes duration since diagnosis:            | 9.73 years    |
| Taking insulin:                               | No            |
| ETDRS classification of diabetic retinopathy: | Moderate NPDR |
| Assigned group:                               | NPDR          |
| Fluoresceine Angiography:                     |               |
| Leakage (Fovea centralis affected)            | Yes           |
| Central Ischemia:                             | No            |
| Neovascularization of the optic disc (NVD):   | No            |
| Neovascularization elsewhere (NVE):           | No            |

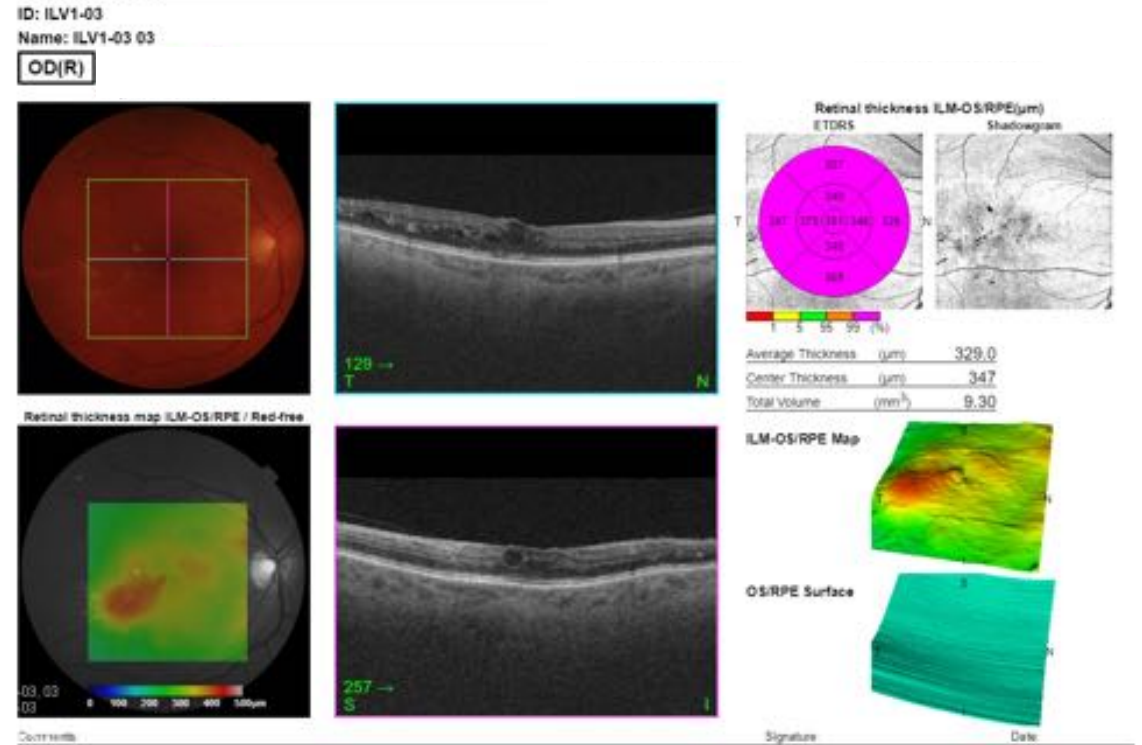

## Patient 4 (ILV-04)

|                                               |             |
|-----------------------------------------------|-------------|
| Age and sex:                                  | 78, male    |
| Study eye:                                    | Left        |
| HbA1C:                                        | 6.61        |
| Blood Pressure:                               | 120/70      |
| Diabetes mellitus type:                       | Type 2      |
| Diabetes duration since diagnosis:            | 10.24 years |
| Taking insulin:                               | Yes         |
| ETDRS classification of diabetic retinopathy: | Severe NPDR |
| Assigned group:                               | NPDR        |
| Fluoresceine Angiography:                     |             |
| Leakage (Fovea centralis affected)            | Yes         |
| Central Ischemia:                             | Yes         |
| Neovascularization of the optic disc (NVD):   | No          |
| Neovascularization elsewhere (NVE):           | No          |

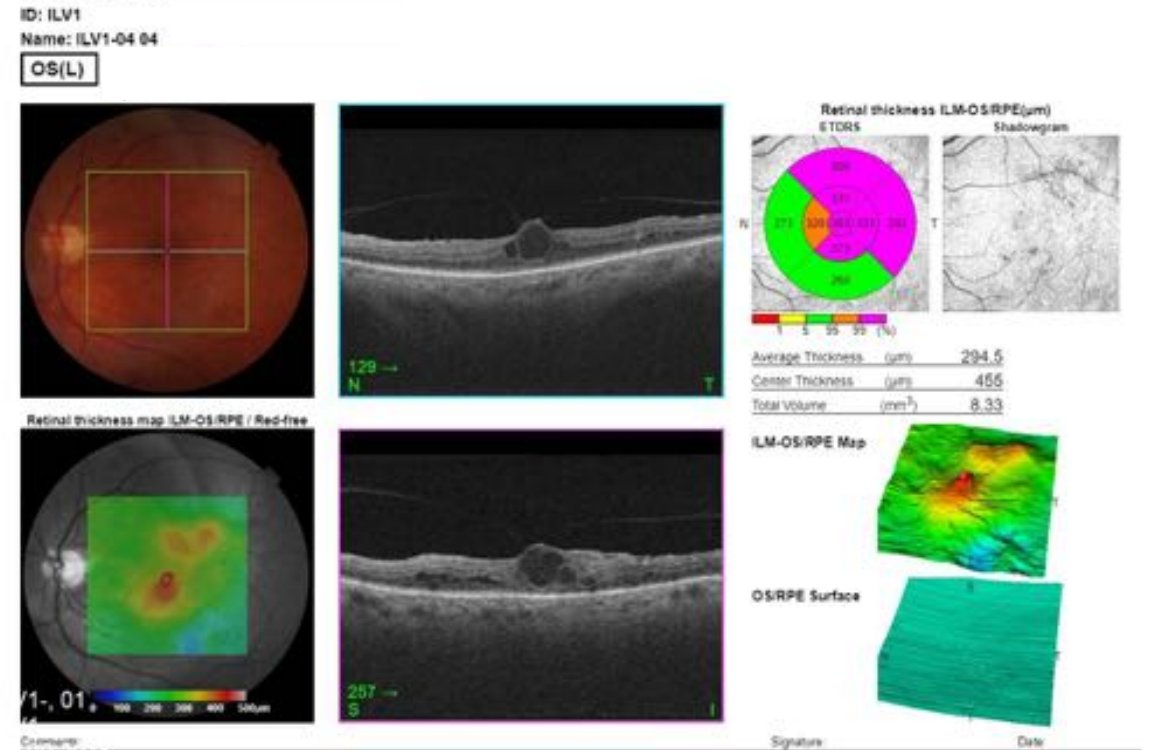

## Patient 5 (ILV-05)

|                                               |                   |
|-----------------------------------------------|-------------------|
| Age and sex:                                  | 59, male          |
| Study eye:                                    | Right             |
| HbA1C:                                        | 8.52              |
| Blood Pressure:                               | 140/70            |
| Diabetes mellitus type:                       | Type 2            |
| Diabetes duration since diagnosis:            | 29.34 years       |
| Taking insulin:                               | Yes               |
| ETDRS classification of diabetic retinopathy: | Mild-moderate PDR |
| Assigned group:                               | PDR               |
| Fluoresceine Angiography:                     |                   |
| Leakage (Fovea centralis affected)            | Yes               |
| Central Ischemia:                             | Yes               |
| Neovascularization of the optic disc (NVD):   | Yes               |
| Neovascularization elsewhere (NVE):           | Yes               |

ID: ILV1-05  
Name: ILV1-05 05  
OD(R)

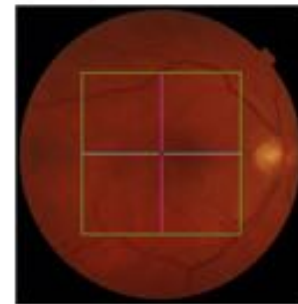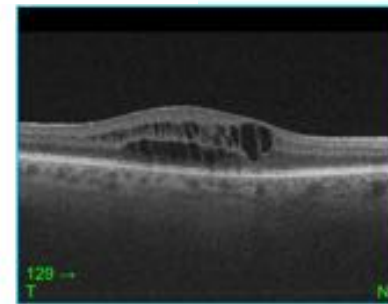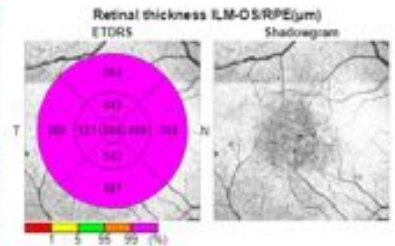

Average Thickness (μm) 400.6  
Center Thickness (μm) 576  
Total Volume (mm<sup>3</sup>) 11.33

Retinal thickness map ILM-OS/RPE / Red-free

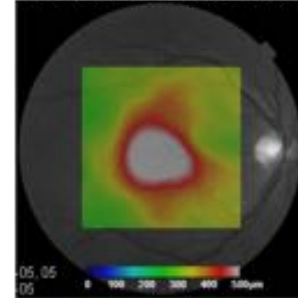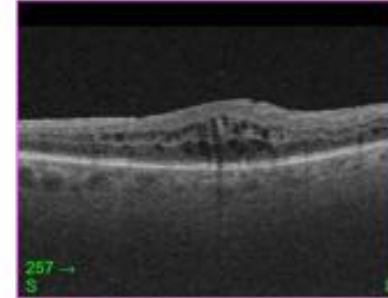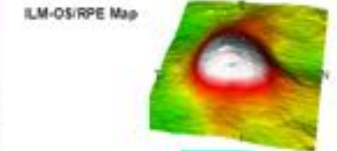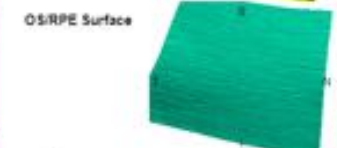

Comments:

Signature

Date

## Patient 6 (ILV-06)

|                                               |                  |
|-----------------------------------------------|------------------|
| Age and sex:                                  | 60, male         |
| Study eye:                                    | Left             |
| HbA1C:                                        | 7.95             |
| Blood Pressure:                               | 160/85           |
| Diabetes mellitus type:                       | Type 2           |
| Diabetes duration since diagnosis:            | 10.38 years      |
| Taking insulin:                               | Yes              |
| ETDRS classification of diabetic retinopathy: | Very severe NPDR |
| Assigned group:                               | PDR              |
| Fluoresceine Angiography:                     |                  |
| Leakage (Fovea centralis affected)            | Yes              |
| Central Ischemia:                             | Not definable    |
| Neovascularization of the optic disc (NVD):   | No               |
| Neovascularization elsewhere (NVE):           | No               |

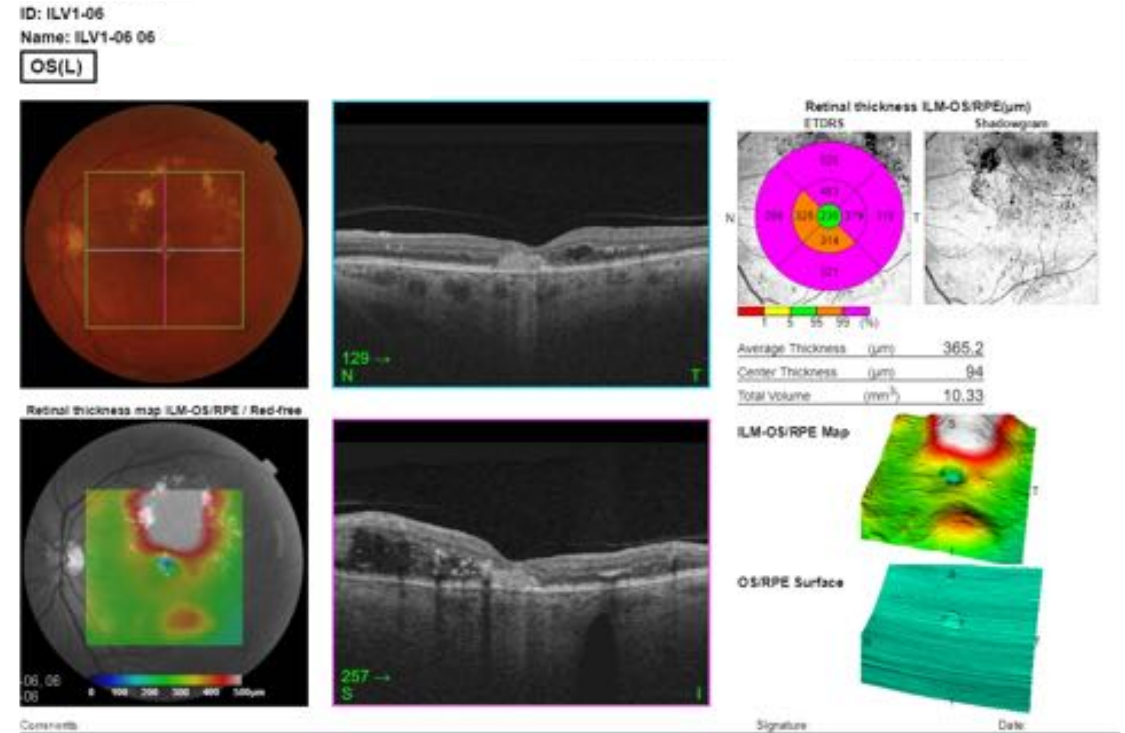

## Patient 7 (ILV-07)

|                                               |               |
|-----------------------------------------------|---------------|
| Age and sex:                                  | 70, female    |
| Study eye:                                    | Left          |
| HbA1C:                                        | 7.08          |
| Blood Pressure:                               | 150/85        |
| Diabetes mellitus type:                       | Type 2        |
| Diabetes duration since diagnosis:            | 30.47 years   |
| Taking insulin:                               | Yes           |
| ETDRS classification of diabetic retinopathy: | Moderate NPDR |
| Assigned group:                               | NPDR          |
| Fluoresceine Angiography:                     |               |
| Leakage (Fovea centralis affected)            | Yes           |
| Central Ischemia:                             | No            |
| Neovascularization of the optic disc (NVD):   | No            |
| Neovascularization elsewhere (NVE):           | No            |

ID : ILV1-07

Name : 07 ILV1-07

OS(L)

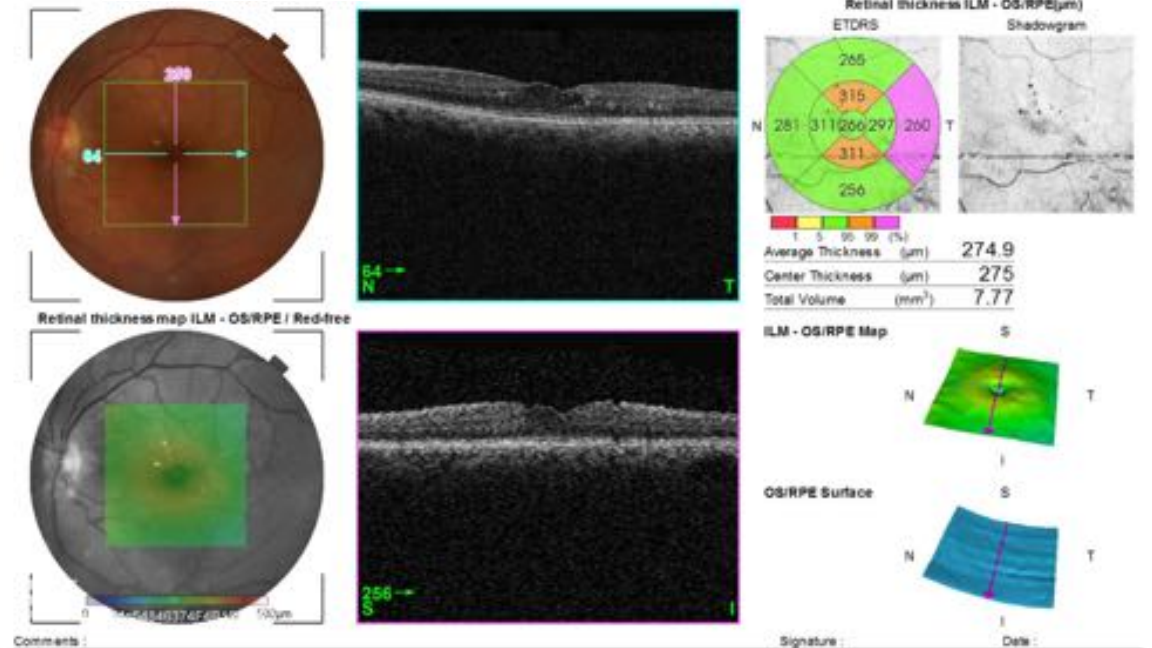

## Patient 8 (ILV-08)

|                                               |                     |
|-----------------------------------------------|---------------------|
| Age and sex:                                  | 55, female          |
| Study eye:                                    | Right               |
| HbA1C:                                        | 6.7                 |
| Blood Pressure:                               | 160/80              |
| Diabetes mellitus type:                       | Type 2              |
| Diabetes duration since diagnosis:            | 0.98 years          |
| Taking insulin:                               | Yes                 |
| ETDRS classification of diabetic retinopathy: | Very severe<br>NPDR |
| Assigned group:                               | PDR                 |
| Fluoresceine Angiography:                     |                     |
| Leakage (Fovea centralis affected)            | Yes                 |
| Central Ischemia:                             | Yes                 |
| Neovascularization of the optic disc (NVD):   | No                  |
| Neovascularization elsewhere (NVE):           | No                  |

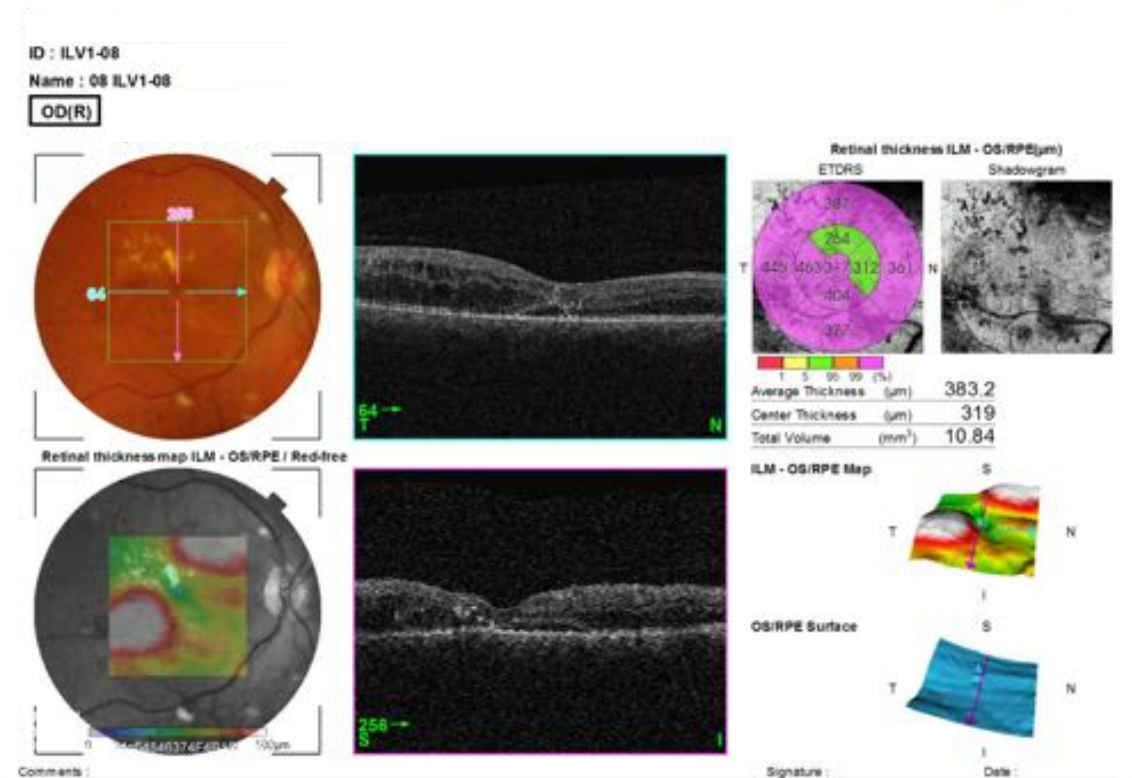



Patient 9 (ILV-09) declined to participate

## Patient 10 (ILV-10)

|                                                      |               |
|------------------------------------------------------|---------------|
| <b>Age and sex:</b>                                  | 43, male      |
| <b>Study eye:</b>                                    | Right         |
| <b>HbA1C:</b>                                        | 7.19          |
| <b>Blood Pressure:</b>                               | 120/90        |
| <b>Diabetes mellitus type:</b>                       | Type 1        |
| <b>Diabetes duration since diagnosis:</b>            | 20.54 years   |
| <b>Taking insulin:</b>                               | Yes           |
| <b>ETDRS classification of diabetic retinopathy:</b> | High-risk PDR |
| <b>Assigned group:</b>                               | PDR           |
| <b>Fluoresceine Angiography:</b>                     |               |
| <b>Leakage (Fovea centralis affected)</b>            | Yes           |
| <b>Central Ischemia:</b>                             | Yes           |
| <b>Neovascularization of the optic disc (NVD):</b>   | No            |
| <b>Neovascularization elsewhere (NVE):</b>           | Yes           |

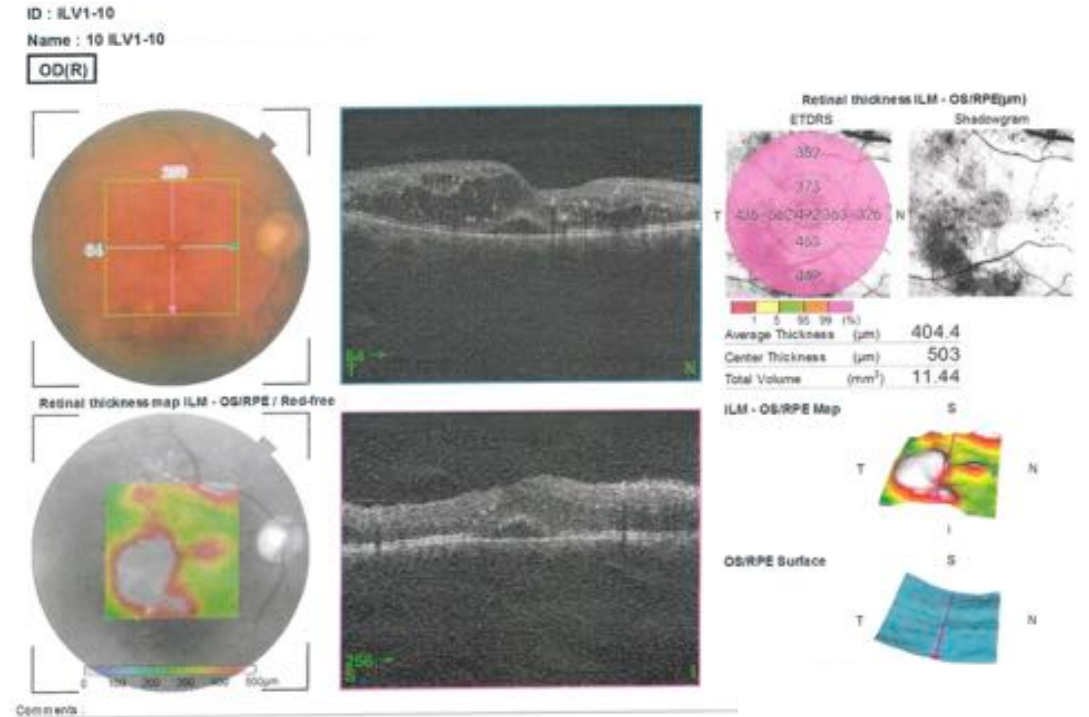

## Patient 11 (ILV-11)

|                                               |                  |
|-----------------------------------------------|------------------|
| Age and sex:                                  | 77, male         |
| Study eye:                                    | Right            |
| HbA1C:                                        | 7.72             |
| Blood Pressure:                               | 130/70           |
| Diabetes mellitus type:                       | Type 2           |
| Diabetes duration since diagnosis:            | 18.56 years      |
| Taking insulin:                               | Yes              |
| ETDRS classification of diabetic retinopathy: | Very severe NPDR |
| Assigned group:                               | PDR              |
| Fluoresceine Angiography:                     |                  |
| Leakage (Fovea centralis affected)            | Yes              |
| Central Ischemia:                             | Yes              |
| Neovascularization of the optic disc (NVD):   | No               |
| Neovascularization elsewhere (NVE):           | No               |

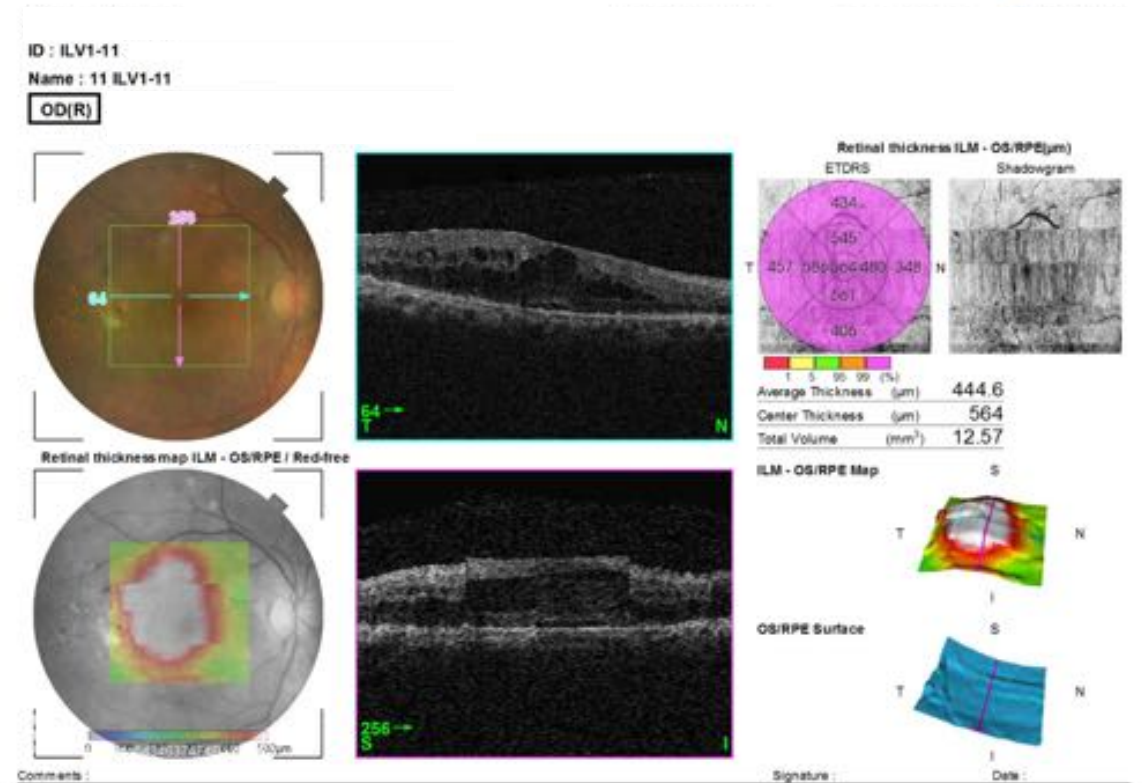

## Patient 12 (ILV-12)

|                                               |             |
|-----------------------------------------------|-------------|
| Age and sex:                                  | 64, male    |
| Study eye:                                    | Right       |
| HbA1C:                                        | 8.06        |
| Blood Pressure:                               | 140/80      |
| Diabetes mellitus type:                       | Type 2      |
| Diabetes duration since diagnosis:            | 18.57 years |
| Taking insulin:                               | Yes         |
| ETDRS classification of diabetic retinopathy: | Severe NPDR |
| Assigned group:                               | NPDR        |
| Fluoresceine Angiography:                     |             |
| Leakage (Fovea centralis affected)            | Yes         |
| Central Ischemia:                             | Yes         |
| Neovascularization of the optic disc (NVD):   | No          |
| Neovascularization elsewhere (NVE):           | No          |

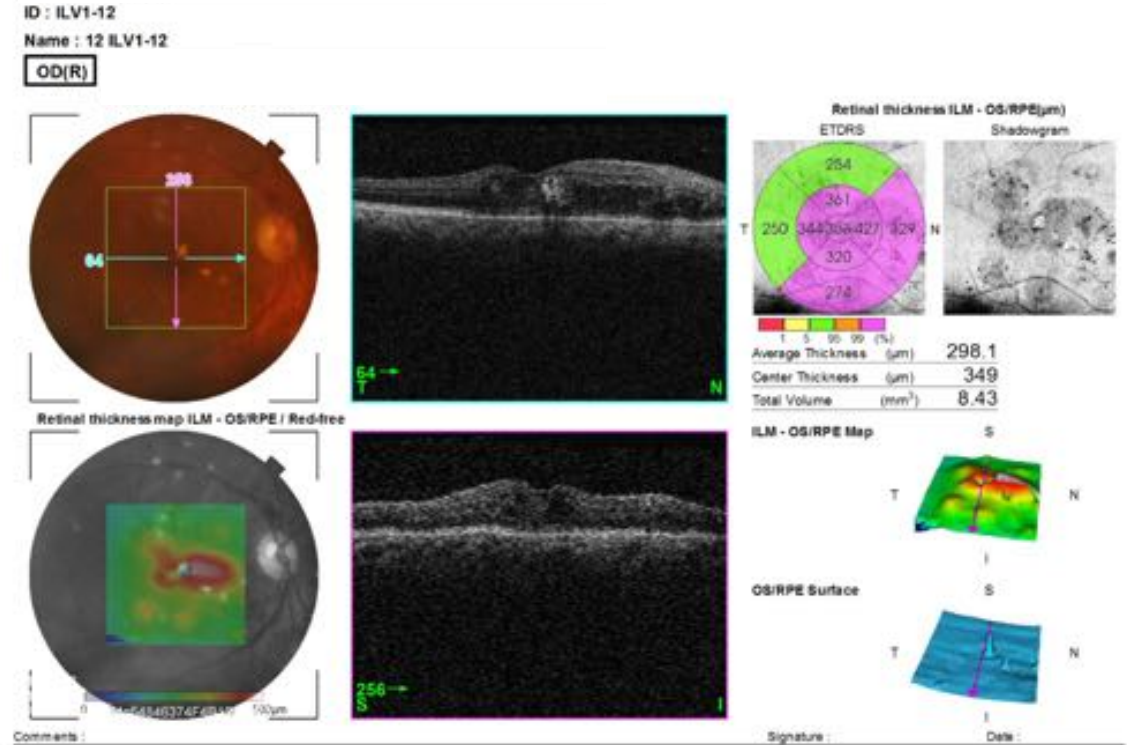

Supplement: pone.0248439.s002.pdf [file pone.0248439.s002.pdf]
