# Supplementary material for: Vitreous expression of cytokines and growth factors in patients with diabetic retinopathy—An investigation of their expression based on clinical diabetic retinopathy grade
Source: PubMed Central journal article supplement (PMC8133486; doi:10.1371/journal.pone.0248439), 2021-05-19
Supplement: pone.0248439.s003.pdf [file pone.0248439.s003.pdf]

| <b>Flex sets CBA Fa. BD</b>     | <b>Source</b>    | <b>Cat. No.</b> | <b>Kit Lot. Nr.</b> |
|---------------------------------|------------------|-----------------|---------------------|
| Human IL-6 CBA Flex set         | Becton Dickinson | 558276          | 9275025             |
| Human VEGF CBA Flex set         | Becton Dickinson | 558336          | 9232667             |
| Human IL-8 CBA Flex set         | Becton Dickinson | 558277          | 101826              |
| Human MCP-1 CBA Flex set        | Becton Dickinson | 558287          | 9363487             |
| Human IP-10 CBA Flex set        | Becton Dickinson | 558280          | 9326136             |
| Human CD54/ ICAM-1 CBA Flex set | Becton Dickinson | 560269          | 8355856             |
| Human IL-10 CBA Flex set        | Becton Dickinson | 558274          | 9263316             |
| Human TNF CBA Flex set          | Becton Dickinson | 560112          | 9213241             |
| Human IFN gamma CBA Flex set    | Becton Dickinson | 558269          | 9263333             |

| <b>ELISA-Kits</b>            | <b>Source</b> | <b>Cat. No.</b> | <b>Kit Lot. Nr.</b> |
|------------------------------|---------------|-----------------|---------------------|
| Human PIGF                   | R&D           | DPG00           | P238955             |
| Human Serpin F1 /PEDF Duoset | R&D           | DY1177-05       | P199635             |
| Human Erythropoetin EPO      | R&D           | DEPRU0          | P250497             |
| Human IL-16                  | R&D           | D1600           | P245256             |
